# Supplementary material for: A simple fluorescent probe for selectively detecting Al3+ and F− in living cells and growing tea plants
Source: Royal Society of Chemistry journal article supplement (doi:10.1039/d4ay01419g), 2024-01-01

## checkCIF/PLATON report

Structure factors have been supplied for datablock(s) 1

THIS REPORT IS FOR GUIDANCE ONLY. IF USED AS PART OF A REVIEW PROCEDURE FOR PUBLICATION, IT SHOULD NOT REPLACE THE EXPERTISE OF AN EXPERIENCED CRYSTALLOGRAPHIC REFEREE.

No syntax errors found.      CIF dictionary      Interpreting this report

### Datablock: 1

---

Bond precision:      C-C = 0.0063 Å      Wavelength=0.71073

Cell:                      a=18.512 (3)              b=27.014 (4)              c=7.4371 (12)  
                                    alpha=90              beta=90              gamma=90

Temperature:              296 K

|                        | Calculated                 | Reported       |
|------------------------|----------------------------|----------------|
| Volume                 | 3719.2(10)                 | 3719.2(10)     |
| Space group            | P c c n                    | P c c n        |
| Hall group             | -P 2ab 2ac                 | -P 2ab 2ac     |
| Moiety formula         | C18 H20 N4 O S [+ solvent] | C18 H20 N4 O S |
| Sum formula            | C18 H20 N4 O S [+ solvent] | C18 H20 N4 O S |
| Mr                     | 340.44                     | 340.44         |
| Dx, g cm <sup>-3</sup> | 1.216                      | 1.216          |
| Z                      | 8                          | 8              |
| Mu (mm <sup>-1</sup> ) | 0.185                      | 0.185          |
| F000                   | 1440.0                     | 1440.0         |
| F000'                  | 1441.45                    |                |
| h, k, lmax             | 24, 35, 9                  | 23, 34, 9      |
| Nref                   | 4283                       | 4014           |
| Tmin, Tmax             | 0.955, 0.978               | 0.662, 0.746   |
| Tmin'                  | 0.955                      |                |

Correction method= # Reported T Limits: Tmin=0.662 Tmax=0.746  
AbsCorr = MULTI-SCAN

Data completeness= 0.937              Theta(max)= 27.526

R(reflections)= 0.0757( 1934)

wR2(reflections)=  
0.2646( 4014)

S = 1.052

Npar= 220

---

The following ALERTS were generated. Each ALERT has the format

**test-name\_ALERT\_alert-type\_alert-level.**

Click on the hyperlinks for more details of the test.

---

### ● Alert level C

|                   |                                                  |         |              |
|-------------------|--------------------------------------------------|---------|--------------|
| PLAT026_ALERT_3_C | Ratio Observed / Unique Reflections (too) Low .. | 48%     | Check        |
| PLAT084_ALERT_3_C | High wR2 Value (i.e. > 0.25) .....               | 0.26    | Report       |
| PLAT220_ALERT_2_C | NonSolvent Resd 1 C Ueq(max)/Ueq(min) Range      | 3.8     | Ratio        |
| PLAT222_ALERT_3_C | NonSolvent Resd 1 H Uiso(max)/Uiso(min) Range    | 4.4     | Ratio        |
| PLAT241_ALERT_2_C | High 'MainMol' Ueq as Compared to Neighbors of   | N4      | Check        |
| PLAT242_ALERT_2_C | Low 'MainMol' Ueq as Compared to Neighbors of    | C15     | Check        |
| PLAT242_ALERT_2_C | Low 'MainMol' Ueq as Compared to Neighbors of    | C17     | Check        |
| PLAT340_ALERT_3_C | Low Bond Precision on C-C Bonds .....            | 0.00633 | Ang.         |
| PLAT360_ALERT_2_C | Short C(sp3)-C(sp3) Bond C15 - C16 .             | 1.42    | Ang.         |
| PLAT413_ALERT_2_C | Short Inter XH3 .. XHn H16A ..H16A .             | 2.10    | Ang.         |
|                   | 1/2-x, 3/2-y, z =                                | 2_565   | Check        |
| PLAT420_ALERT_2_C | D-H Bond Without Acceptor N2 --H2 .              |         | Please Check |
| PLAT906_ALERT_3_C | Large K Value in the Analysis of Variance .....  | 7.789   | Check        |
| PLAT906_ALERT_3_C | Large K Value in the Analysis of Variance .....  | 2.048   | Check        |
| PLAT911_ALERT_3_C | Missing FCF Refl Between Thmin & STh/L= 0.600    | 6       | Report       |
|                   | 22 0 0, 22 2 0, 0 30 0, 1 31 0, 0 32 0,          | 2 32 0, |              |

---

### ● Alert level G

|                   |                                                            |        |        |
|-------------------|------------------------------------------------------------|--------|--------|
| PLAT002_ALERT_2_G | Number of Distance or Angle Restraints on AtSite           | 2      | Note   |
| PLAT003_ALERT_2_G | Number of Uiso or U(i,j) Restrained non-H Atoms            | 3      | Report |
| PLAT007_ALERT_5_G | Number of Unrefined Donor-H Atoms .....                    | 2      | Report |
|                   | H1 H2                                                      |        |        |
| PLAT072_ALERT_2_G | SHELXL First Parameter in WGHT Unusually Large             | 0.14   | Report |
| PLAT172_ALERT_4_G | The CIF-Embedded .res File Contains DFIX Records           | 1      | Report |
| PLAT177_ALERT_4_G | The CIF-Embedded .res File Contains DELU Records           | 1      | Report |
| PLAT192_ALERT_3_G | A Non-default DELU Restraint Value for First Par           | 0.0010 | Report |
| PLAT192_ALERT_3_G | A Non-default DELU Restraint Value for SecondPar           | 0.0020 | Report |
| PLAT605_ALERT_4_G | Largest Solvent Accessible VOID in the Structure           | 100    | A**3   |
| PLAT860_ALERT_3_G | Number of Least-Squares Restraints .....                   | 4      | Note   |
| PLAT868_ALERT_4_G | ALERTS Due to the Use of _smtbx_masks Suppressed           | !      | Info   |
| PLAT910_ALERT_3_G | Missing # of FCF Reflection(s) Below Theta(Min).           | 2      | Note   |
|                   | 1 1 0, 0 2 0,                                              |        |        |
| PLAT912_ALERT_4_G | Missing # of FCF Reflections Above STh/L= 0.600            | 259    | Note   |
| PLAT969_ALERT_5_G | The 'Henn et al.' R-Factor-gap value .....                 | 5.518  | Note   |
|                   | Predicted wR2: Based on SigI**2 4.80 or SHELX Weight 25.15 |        |        |
| PLAT978_ALERT_2_G | Number C-C Bonds with Positive Residual Density.           | 0      | Info   |

---

0 **ALERT level A** = Most likely a serious problem - resolve or explain  
0 **ALERT level B** = A potentially serious problem, consider carefully  
14 **ALERT level C** = Check. Ensure it is not caused by an omission or oversight  
15 **ALERT level G** = General information/check it is not something unexpected

0 ALERT type 1 CIF construction/syntax error, inconsistent or missing data  
11 ALERT type 2 Indicator that the structure model may be wrong or deficient  
11 ALERT type 3 Indicator that the structure quality may be low  
5 ALERT type 4 Improvement, methodology, query or suggestion  
2 ALERT type 5 Informative message, check

---

---

It is advisable to attempt to resolve as many as possible of the alerts in all categories. Often the minor alerts point to easily fixed oversights, errors and omissions in your CIF or refinement strategy, so attention to these fine details can be worthwhile. In order to resolve some of the more serious problems it may be necessary to carry out additional measurements or structure refinements. However, the purpose of your study may justify the reported deviations and the more serious of these should normally be commented upon in the discussion or experimental section of a paper or in the "special\_details" fields of the CIF. checkCIF was carefully designed to identify outliers and unusual parameters, but every test has its limitations and alerts that are not important in a particular case may appear. Conversely, the absence of alerts does not guarantee there are no aspects of the results needing attention. It is up to the individual to critically assess their own results and, if necessary, seek expert advice.

### **Publication of your CIF in IUCr journals**

A basic structural check has been run on your CIF. These basic checks will be run on all CIFs submitted for publication in IUCr journals (*Acta Crystallographica*, *Journal of Applied Crystallography*, *Journal of Synchrotron Radiation*); however, if you intend to submit to *Acta Crystallographica Section C* or *E* or *IUCrData*, you should make sure that full publication checks are run on the final version of your CIF prior to submission.

### **Publication of your CIF in other journals**

Please refer to the *Notes for Authors* of the relevant journal for any special instructions relating to CIF submission.

---

**PLATON version of 15/07/2024; check.def file version of 15/07/2024**

Datablock 1 - ellipsoid plot

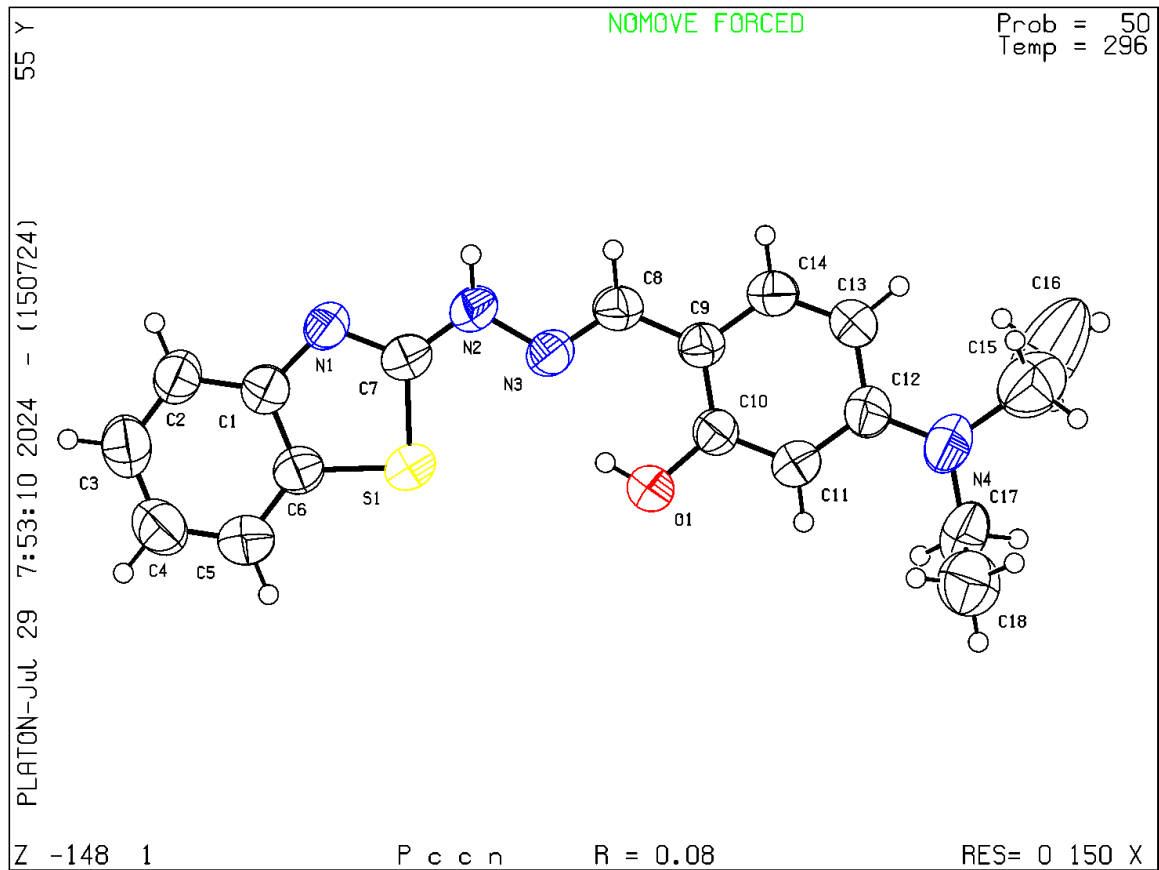

Supplement: d4ay01419g2.pdf [file d4ay01419g2.pdf]
