# Supplementary material for: A simple fluorescent probe for selectively detecting Al3+ and F− in living cells and growing tea plants
Source: Royal Society of Chemistry journal article supplement (doi:10.1039/d4ay01419g), 2024-01-01

## A simple fluorescent probe for selectively detecting Al<sup>3+</sup> and F<sup>-</sup> in cells and tea plant roots

Didi Hu <sup>a, 1</sup>, Yingcui Bu <sup>a, 1</sup>, Mengxiao Liu <sup>a</sup>, Fuqing Bai <sup>b</sup>, Jingjing Li <sup>b</sup>, Longchun Li <sup>a</sup>, Huimei Cai <sup>b\*</sup>, Xiaoping Gan <sup>a\*</sup>

<sup>a</sup> School of Materials and Chemistry, Anhui Agricultural University, 230036 Hefei, P. R. China

<sup>b</sup> State Key Laboratory of Tea Plant Biology and Utilization, Anhui Agricultural University, 230036, Hefei, P.R. China

Corresponding author Fax: +86-551-65786121

E-mail: gan-xp@ahau.edu.cn, chm@ahau.edu.cn

<sup>1</sup>: these authors contributed equally to this work and should be considered as co-first authors

**Fig. s1:** <sup>1</sup>H NMR, <sup>13</sup>C NMR spectra of intermediate **BHMP**.

**Fig. s2** (a) Changes of the fluorescence emission of **BHMP** + Al<sup>3+</sup> on addition of different common anions (1. SO<sub>4</sub><sup>2-</sup> 2. SO<sub>3</sub><sup>2-</sup> 3. CO<sub>3</sub><sup>2-</sup> 4. NO<sub>3</sub><sup>-</sup> 5. F<sup>-</sup> 6. Cl<sup>-</sup> 7. Br<sup>-</sup> 8. I<sup>-</sup> 9. S<sup>2-</sup> 10. S<sub>2</sub>O<sub>3</sub><sup>2-</sup> 11. CH<sub>3</sub>COO<sup>-</sup> 12. PO<sub>4</sub><sup>3-</sup> 13. HPO<sub>4</sub><sup>2-</sup>). (b) Changes of the fluorescence intensity following the addition of F<sup>-</sup> at different concentrations to the **BHMP**+Al<sup>3+</sup>.

**Fig. s3** (a) Job's plot between **BHMP** and Al<sup>3+</sup> in CH<sub>3</sub>CN. (b) Benesi-Hilderbrand plot of **BHMP** with Al<sup>3+</sup> in CH<sub>3</sub>CN.

**Fig. s4** Fluorescence response time of **BHMP** to Al<sup>3+</sup> in CH<sub>3</sub>CN.

**Fig. s5** HOMO, LUMO, and energy gap ( $\Delta E = E_{\text{HOMO}} - E_{\text{LUMO}}$ ) of **BHMP** in Enol and Keto form calculated using the B3LYP function with 6-311G(d) basis set.

**Fig. s6** the pH stability(a) of **BHMP** in PBS with different pH values and kinetic stability(b) in different solvents.

**Fig. s7** MTT assays of Hela cells treated with **BHMP** at different concentrations for 24 h.

**Table s1** the crystallographic data of **BHMP**

**Table s2** Comparison of parameters between **BHMP** and other reported probes for Al<sup>3+</sup> detection

**Scheme s1** the synthetic routes of target compound **BHMP**.

**Fig. s1**  $^1\text{H}$  NMR and  $^{13}\text{C}$  NMR spectra of intermediate **BHMP**.

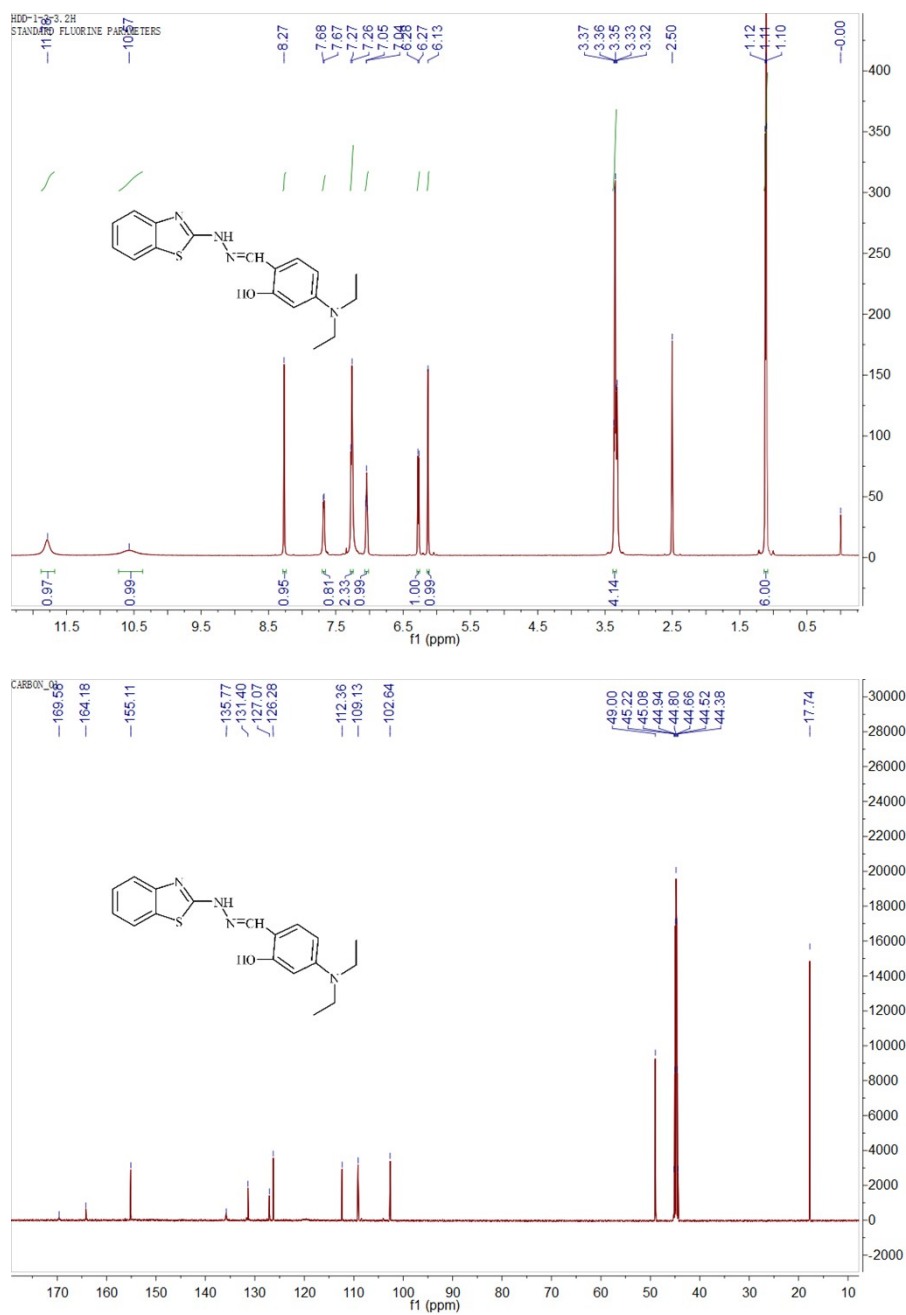

**Fig. s2** (a) Changes of the fluorescence emission of **BHMP** +  $\text{Al}^{3+}$  on addition of different common anions (1.  $\text{SO}_4^{2-}$  2.  $\text{SO}_3^{2-}$  3.  $\text{CO}_3^{2-}$  4.  $\text{NO}_3^-$  5.  $\text{F}^-$  6.  $\text{Cl}^-$  7.  $\text{Br}^-$  8.  $\text{I}^-$  9.  $\text{S}^{2-}$  10.  $\text{S}_2\text{O}_3^{2-}$  11.  $\text{CH}_3\text{COO}^-$  12.  $\text{PO}_4^{3-}$  13.  $\text{HPO}_4^{2-}$ ). (b) Changes of the fluorescence intensity following the addition of  $\text{F}^-$  at different concentrations to the **BHMP**+ $\text{Al}^{3+}$ .

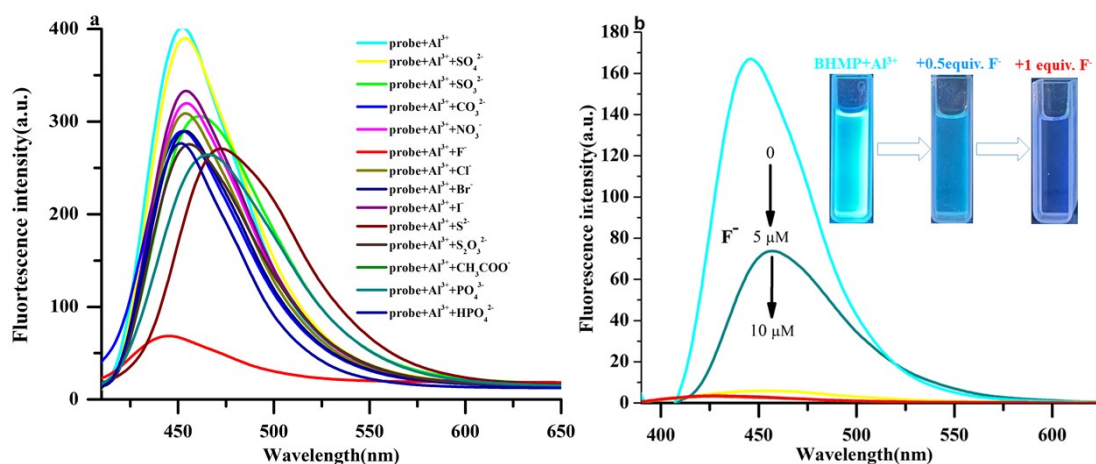

**Fig. s3**(a) Job's plot between **BHMP** and  $\text{Al}^{3+}$  in  $\text{CH}_3\text{CN}$ . (b) Benesi-Hilderbrand plot of **BHMP** with  $\text{Al}^{3+}$  in  $\text{CH}_3\text{CN}$ .

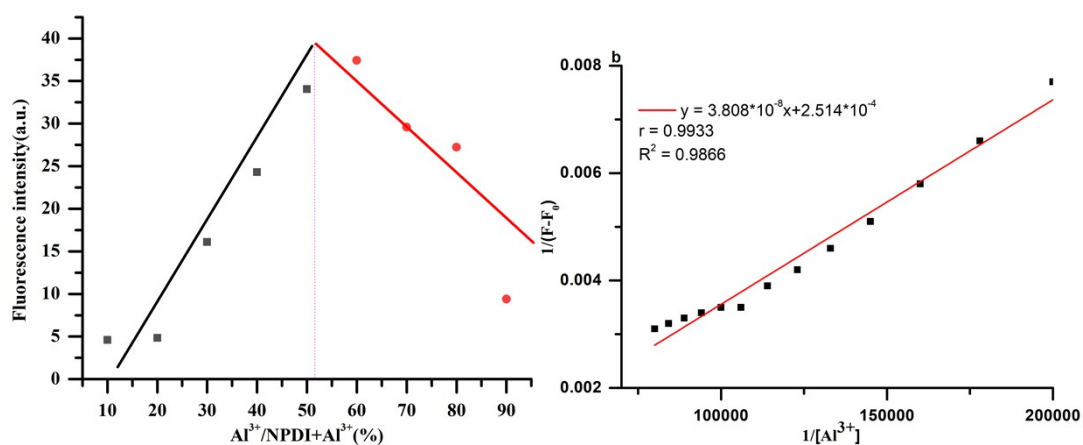

**Fig. s4** Fluorescence response time of **BHMP** to  $\text{Al}^{3+}$  in  $\text{CH}_3\text{CN}$

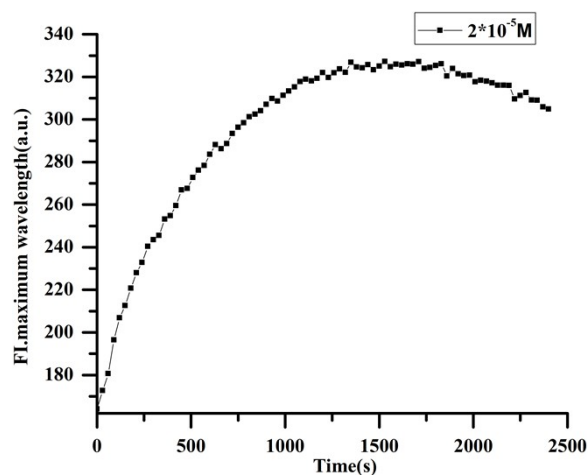

**Fig. s5** HOMO, LUMO, and energy gap ( $\Delta E = E_{\text{HOMO}} - E_{\text{LUMO}}$ ) of **BHMP** in Enol and Keto form calculated using the B3LYP/6-311G(d) basis set.

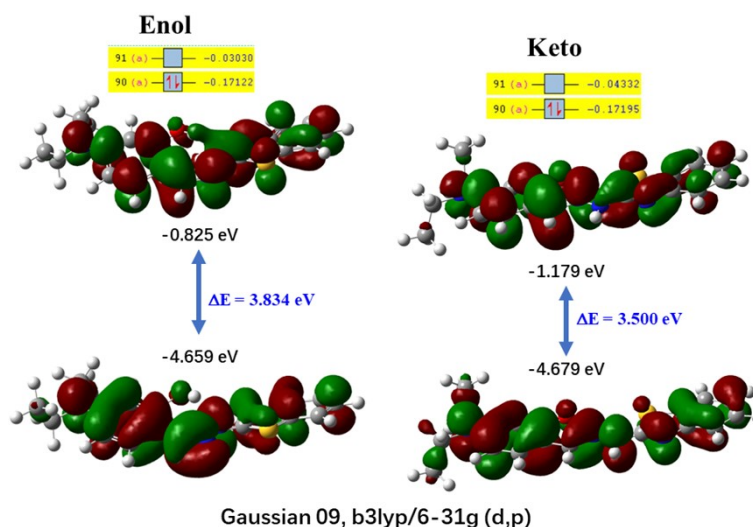

**Fig. s6** the pH stability(a) of **BHMP** in PBS with different pH values and kinetic stability(b) of **BHMP** in different solvents.

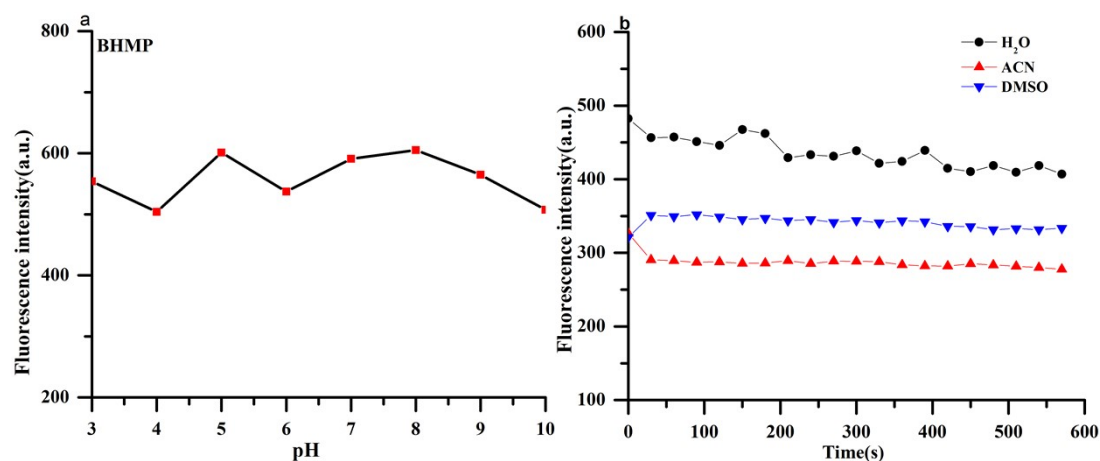

**Fig. s7** MTT assays of HeLa cells treated with **BHMP** at different concentrations for 24 h.

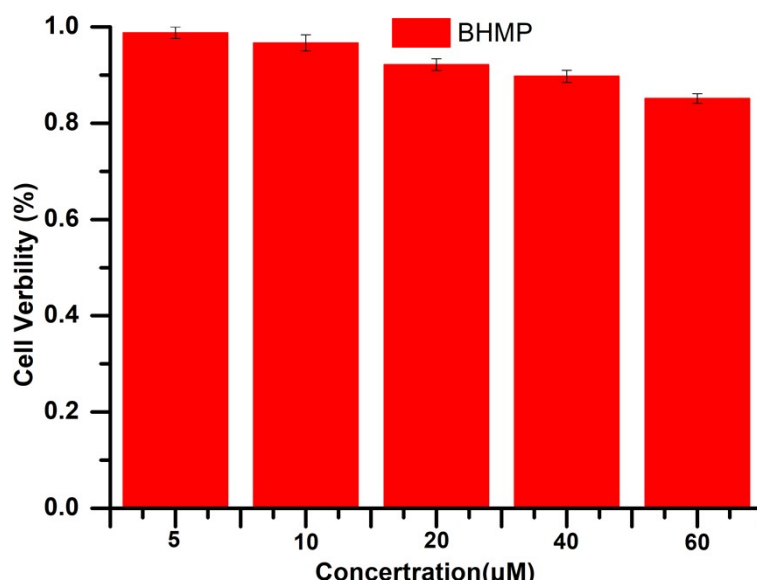

**Table s1:** The crystallographic data of **BHMP**

| Compounds                                | <b>BHMP</b>                                       |
|------------------------------------------|---------------------------------------------------|
| Empirical formula                        | C <sub>18</sub> H <sub>20</sub> N <sub>4</sub> OS |
| Formula weight                           | 340.44                                            |
| Crystal system                           | Orthorhombic                                      |
| Space group                              | Pccn                                              |
| a[Å]                                     | 18.512(3)                                         |
| b[Å]                                     | 27.014(4)                                         |
| c[Å]                                     | 7.4371(12)                                        |
| α[°]                                     | 90                                                |
| β[°]                                     | 90                                                |
| γ[°]                                     | 90                                                |
| V[Å <sup>3</sup> ]                       | 3719.2(10)                                        |
| Z                                        | 8                                                 |
| T[K]                                     | 296                                               |
| D <sub>calcd</sub> [g·cm <sup>-3</sup> ] | 1.216                                             |
| F(000)                                   | 1440.0                                            |
| μ[mm <sup>-1</sup> ]                     | 0.185                                             |
| θrange[°]                                | 2.20-27.53                                        |
| Total no. data                           | 4014                                              |
| No. unique data                          | 1934                                              |
| R <sub>int</sub>                         | 0.1512                                            |
| R <sub>1</sub>                           | 0.0757                                            |
| wR <sub>2</sub>                          | 0.2646                                            |
| GOF                                      | 1.052                                             |

**Table s2:** Comparison of parameters between **BHMP** and other probes for Al<sup>3+</sup> detection

| Probe  | λ <sub>ex</sub><br>(nm) | Medium (v:v)                             | Practical application                       | LOD (mol.L <sup>-1</sup> )                      | Ref.      |
|--------|-------------------------|------------------------------------------|---------------------------------------------|-------------------------------------------------|-----------|
| Flu-py | 523                     | Tris-HCl                                 | Human cervical carcinoma cells              | 0.92×10 <sup>-7</sup><br>1.12×10 <sup>-7</sup>  | [8]       |
| AHN    | 425                     | CH <sub>3</sub> CN                       |                                             | 1.148×10 <sup>-6</sup><br>1.44×10 <sup>-6</sup> | [9]       |
| SPBH   | 478                     | DMF:H <sub>2</sub> O(1:1)                | Human non-small cell lung cancer H460 cells | 1.1×10 <sup>-7</sup><br>1.47×10 <sup>-6</sup>   | [10]      |
| Probe1 | 540                     | CH <sub>3</sub> CN:H <sub>2</sub> O(9:1) | Water containing surfactant SDBS            | 3.2×10 <sup>-8</sup><br>7.5×10 <sup>-7</sup>    | [12]      |
| H-2L   | 607                     | DMSO:H <sub>2</sub> O(1:5)               | A549 cells                                  | 1.05×10 <sup>-8</sup><br>0.98×10 <sup>-8</sup>  | [18]      |
| BHMP   | 490                     | CH <sub>3</sub> CN                       | Hela cells<br>Tea plant roots               | 1.04×10 <sup>-8</sup>                           | This work |

**Scheme s1:** The synthetic routes of target compound **BHMP**.

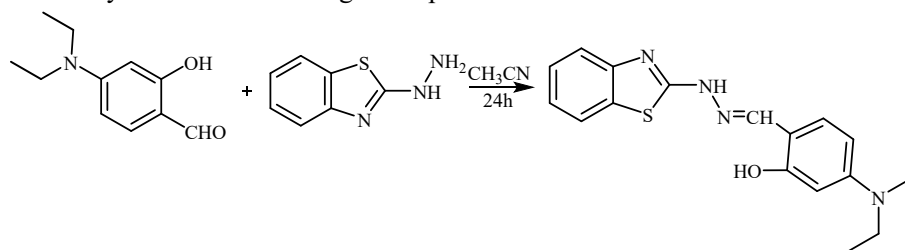

Supplement: d4ay01419g3.pdf [file d4ay01419g3.pdf]
